# Supplementary material for: Identification of Core Prognosis‐Related Candidate Genes in Cervical Cancer via Integrated Bioinformatical Analysis
Source: Hindawi journal article supplement (doi:10.1155/2020/8959210), 2020-01-01
Supplement: f1 [file 8959210.f1.pdf]

391 Supplementary Figure 1. Normalization of gene expression. (A) The normalization of  
 392 GSE63514 data, (B) The normalization of GSE27678 data, and (C) The normalization  
 393 of GSE6791 data.  
 394

Supplementary Figure 1

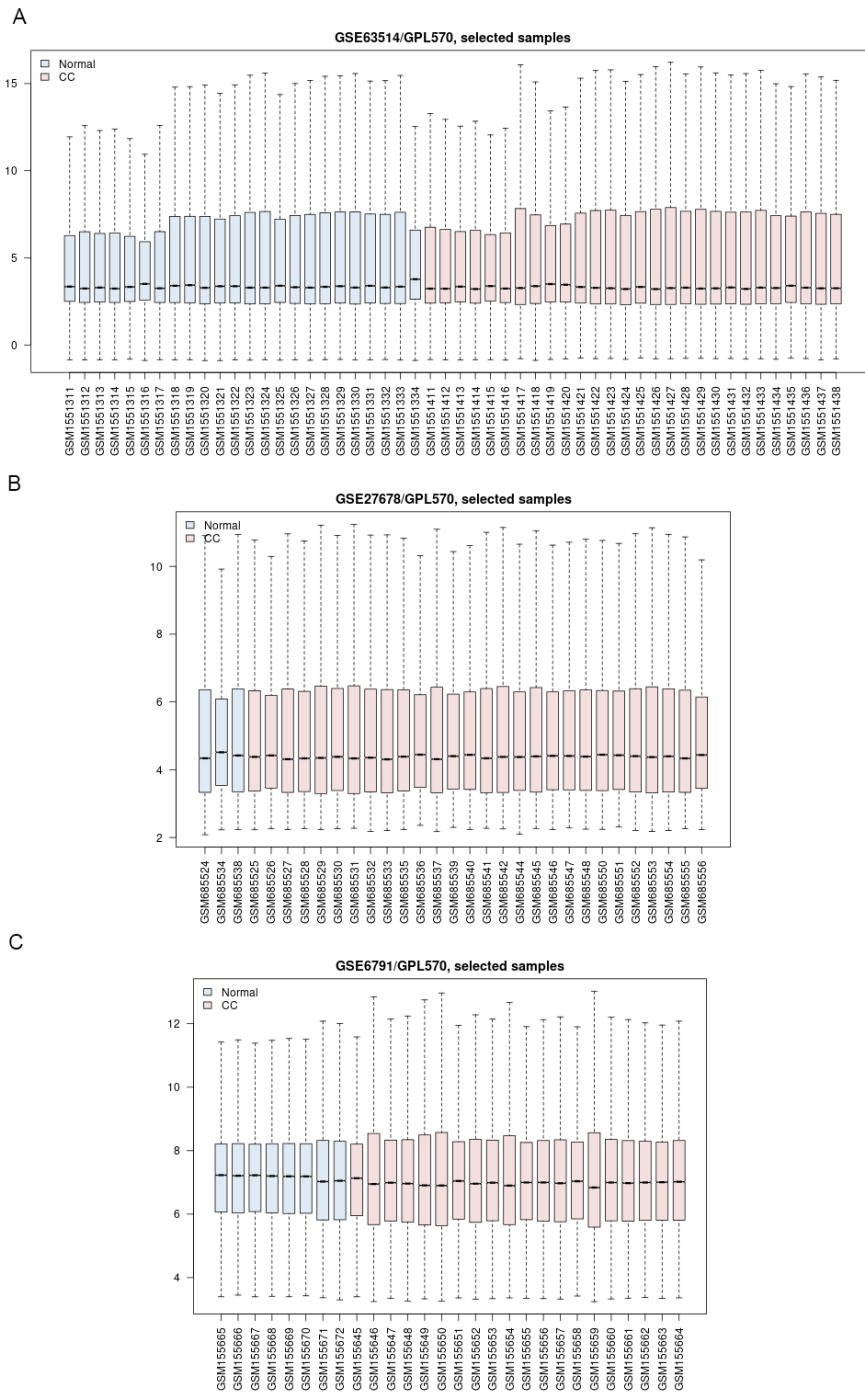

395

396 Supplementary Table 1. Genome-wide analysis of gene expression in cervical  
 397 squamous carcinoma compared to that in normal cervical mucosa (GSE64217)

| ID           | adj.P.Val | logFC | Gene.symbol | Gene.title                                               |
|--------------|-----------|-------|-------------|----------------------------------------------------------|
| ILMN_1767351 | 0.0318    | -1.47 | AR          | androgen receptor                                        |
| ILMN_1771599 | 0.0143    | 2.32  | PLOD2       | procollagen-lysine,<br>2-oxoglutarate<br>5-dioxygenase 2 |
| ILMN_1739645 | 0.016     | 2.09  | ANLN        | anillin actin binding<br>protein                         |
| ILMN_1680955 | 0.0146    | 2.35  | AURKA       | aurora kinase A                                          |

398

399 Supplementary Table 2. The percentage of CC patients that have a worse overall  
 400 survival.

| Gene.symbol | Number of patients<br>with high<br>expression level | Number of patients<br>with low<br>expression level | Percentage of<br>patients with<br>worse prognosis |
|-------------|-----------------------------------------------------|----------------------------------------------------|---------------------------------------------------|
| PLOD2       | 97                                                  | 207                                                | 31.90%                                            |
| ANLN        | 81                                                  | 223                                                | 26.60%                                            |
| AURKA       | 212                                                 | 92                                                 | 69.70%                                            |
| AR          | 186                                                 | 118                                                | 38.80%                                            |

401
